# Supplementary material for: One-Stage Synovectomies Result in Improved Short-Term Outcomes Compared to Two-Stage Synovectomies of Diffuse-Type Tenosynovial Giant Cell Tumor (D-TGCT) of the Knee: A Multicenter, Retrospective, Cohort Study
Source: MDPI journal article supplement (doi:10.3390/cancers15030941), 2023-02-02
Supplement: s1 [file s1]

Supplementary table [s1](#). One- vs two-stage synovectomies per center.

| Centers                          | One-stage   | Two-stage  |
|----------------------------------|-------------|------------|
| LUMC                             | 20          | 19         |
| Previous treatment (%)           | 13 (59)     | 8 (42)     |
| Median Follow-up, months (range) | 18 (10-123) | 62 (3-194) |
| RUMC                             | 17          | 19         |
| Previous treatment (%)           | 11 (58)     | 11 (58)    |
| Median Follow-up, months (range) | 86 (6-200)  | 95 (9-199) |
| MSH                              | 31          |            |
| Previous treatment (%)           | 18 (58)     | -          |
| Median Follow-up, months (range) | 57 (12-157) |            |
| AUMC                             | 6           | 17         |
| Previous treatment (%)           | 2 (33)      | 9 (53)     |
| Median Follow-up, months (range) | 11 (2-62)   | 39 (4-203) |
| MAYO                             | 11          | 6          |
| Previous treatment (%)           | 8 (73)      | 4 (67)     |
| Median Follow-up, months (range) | 45 (10-137) | 32 (6-52)  |
| MCW                              | 15          |            |
| Previous treatment (%)           | 3 (20)      | -          |
| Median Follow-up, months (range) | 54 (4-84)   |            |
| RPAH                             |             | 12         |
| Previous treatment (%)           | -           | 1 (8)      |
| Median Follow-up, months (range) | -           | 62 (4-104) |
| UCD                              | 10          |            |
| Previous treatment (%)           | 4 (40)      | -          |
| Median Follow-up, months (range) | 16 (1-35)   |            |
| UCLA                             | 7           | 1          |
| Previous treatment (%)           | 4 (57)      | (100)      |
| Median Follow-up, months (range) | 49 (23-159) | 58         |
| Total                            | 117         | 74         |
| Previous treatment (%)           | 59 (50)     | 34 (46)    |
| Median Follow-up, months (range) | 45 (1-200)  | 59 (3-203) |

Supplementary table [s2](#). Outcomes for open one- and two-stage synovectomies in particular.

| Features                                                      | One-stage synovectomy<br>open N = 58 | Two-stage synovectomy open<br>N = 67 | P-value |
|---------------------------------------------------------------|--------------------------------------|--------------------------------------|---------|
| Length of hospital stay,<br>days, median (range) <sup>b</sup> | N=56<br>6 (1-13)                     | N=63<br>6 (3-26)                     | 0.008   |
| Maximum range of motion, degrees,<br>median (range)           | N=51                                 | N=46                                 |         |
| Flexion                                                       | 125 (70-145)                         | 120 (45-140)                         | 0.126   |
| Extension                                                     | 0 (0-20†)                            | 0 (0-10†)                            | 0.253   |
| Complications                                                 | N=58                                 | N=64                                 |         |
| Yes                                                           | 13 (22%)                             | 23 (36%)                             | 0.069   |
| No                                                            | 45 (78%)                             | 41 (64%)                             |         |
| Radiological progression                                      | N=57                                 | N=66                                 |         |
| Yes                                                           | 23 (40%)                             | 31 (47%)                             | 0.371   |
| No                                                            | 34 (60%)                             | 35 (53%)                             |         |

†The number of degrees equals the degrees of extension lag

Supplementary table [s3](#). Outcomes per different techniques performed for one-stage synovectomies.

| Features                                                      | Complete open<br>approach N=58 | Combined<br>approach N=51 | Complete arthroscopic<br>approach N=14 | P-value |
|---------------------------------------------------------------|--------------------------------|---------------------------|----------------------------------------|---------|
| Length of hospital stay,<br>days, median (range) <sup>b</sup> | N=56<br>6 (1-13)               | N=53<br>3 (1-8)           | N=53<br>1 (1-4)                        | <0.0001 |
| Maximum range of motion,<br>degrees, median (range)           | N=51                           | N=46                      | N=42                                   |         |
| Flexion                                                       | 125 (70-145)                   | 120 (90-140)              | 127.5 (90-140)                         | 0.654   |
| Extension                                                     | 0 (0-20†)                      | 3 (0-30†)                 | 0 (0-15†)                              | 0.092   |
| Complications                                                 | N=58                           | N=50                      | N=12                                   |         |
| Yes                                                           | 13 (22%)                       | 14 (28%)                  | -                                      | 0.009   |
| No                                                            | 45 (78%)                       | 36 (72%)                  | 12 (100%)                              |         |
| Radiological progression                                      | N=57                           | N=51                      | N=12                                   |         |
| Yes                                                           | 23 (40%)                       | 17 (33%)                  | 5 (42%)                                | 0.069   |
| No                                                            | 34 (60%)                       | 34 (67%)                  | 7 (58%)                                |         |

†The number of degrees equals the degrees of extension lag

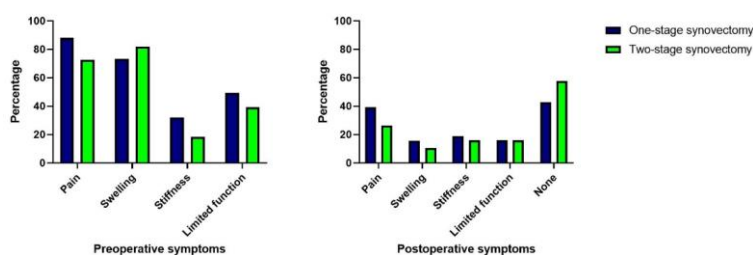

Supplementary figure [s1](#). Pre- and postoperative symptoms of patients undergoing a one- or two-stage synovectomy and no subsequent treatment

Supplementary table 2. Outcomes for open one- and two-stage synovectomies in particular.

| Features                                                   | One-stage synovectomy open<br>N=58 | Two-stage synovectomy open<br>N=67 | P-value |
|------------------------------------------------------------|------------------------------------|------------------------------------|---------|
| Length of hospital stay, days, median (range) <sup>a</sup> | N=56<br>6 (1-13)                   | N=63<br>6 (3-26)                   | 0.008   |
| Maximum range of motion, degrees, median (range)           | N=51                               | N=46                               |         |
| Flexion                                                    | 125 (70-145)                       | 120 (45-140)                       | 0.126   |
| Extension                                                  | 0 (0-20†)                          | 0 (0-10†)                          | 0.253   |
| Complications                                              | N=58                               | N=64                               |         |
| Yes                                                        | 13 (22%)                           | 23 (36%)                           | 0.069   |
| No                                                         | 45 (78%)                           | 41 (64%)                           |         |
| Radiological progression                                   | N=57                               | N=66                               |         |
| Yes                                                        | 23 (40%)                           | 31 (47%)                           | 0.371   |
| No                                                         | 34 (60%)                           | 35 (53%)                           |         |

**Formatted:** Automatically adjust right indent when grid is defined, Snap to grid

**Commented [SG(1):** These tables are duplicate and should be removed

| Features                                                   | One-stage synovectomy open<br>N=58 | Two-stage synovectomy open<br>N=67 | P-value |
|------------------------------------------------------------|------------------------------------|------------------------------------|---------|
| Length of hospital stay, days, median (range) <sup>a</sup> | N=56<br>6 (1-13)                   | N=63<br>6 (3-26)                   | 0.008   |
| Maximum range of motion, degrees, median (range)           | N=51                               | N=46                               |         |
| Flexion                                                    | 125 (70-145)                       | 120 (45-140)                       | 0.126   |
| Extension                                                  | 0 (0-20†)                          | 0 (0-10†)                          | 0.253   |
